# Supplementary material for: Morphological evolution of hierarchical Bi2Se3/BiOBr nanostructures and enhanced activity for p-nitrophenol reduction by NaBH4
Source: Royal Society of Chemistry journal article supplement (doi:10.1039/c7ce01025g), 2017-01-01
Supplement: c7ce01025g1.pdf [file c7ce01025g1.pdf]

## Electronic Supplementary material

### Morphological evolution of hierarchical $\text{Bi}_2\text{Se}_3/\text{BiOBr}$ nanostructures and enhanced activity for p-nitrophenol reduction by $\text{NaBH}_4$

Jianjun Wang<sup>1,2,3</sup>, Aidong Tang<sup>\*1</sup>, Lin Tan<sup>1</sup>, Huaming Yang<sup>2,3</sup>, Jin Ouyang<sup>2,3\*</sup>

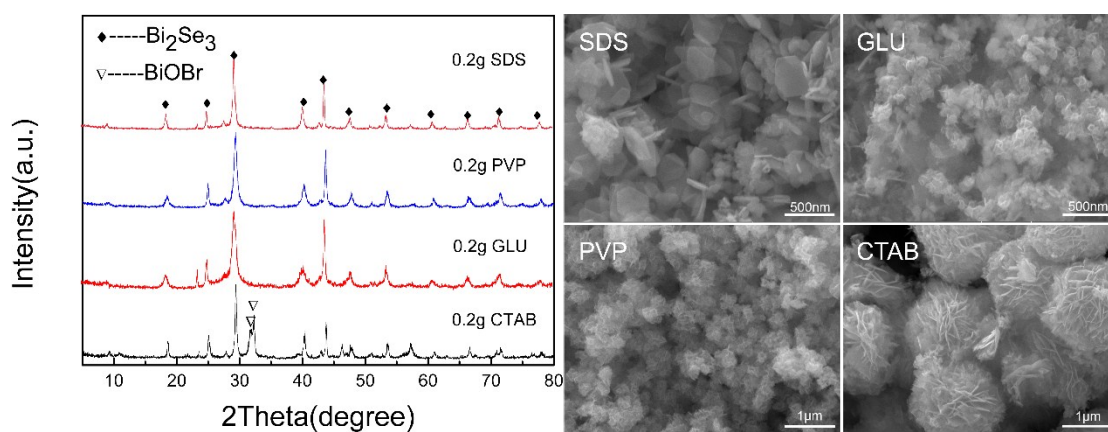

Figure.S1 XRD patterns and SEM images of different additives

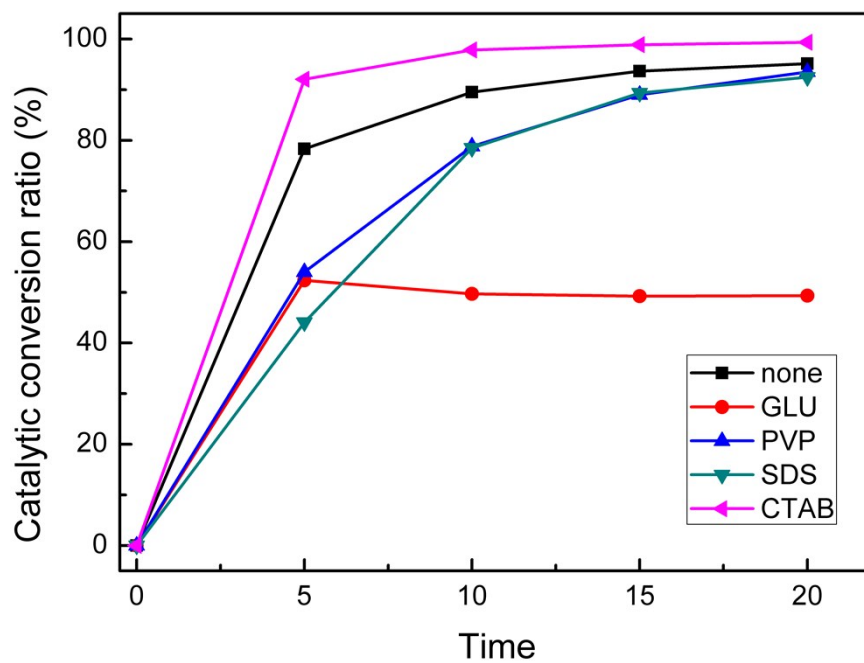

Figure.S2 catalytic performance of different additives

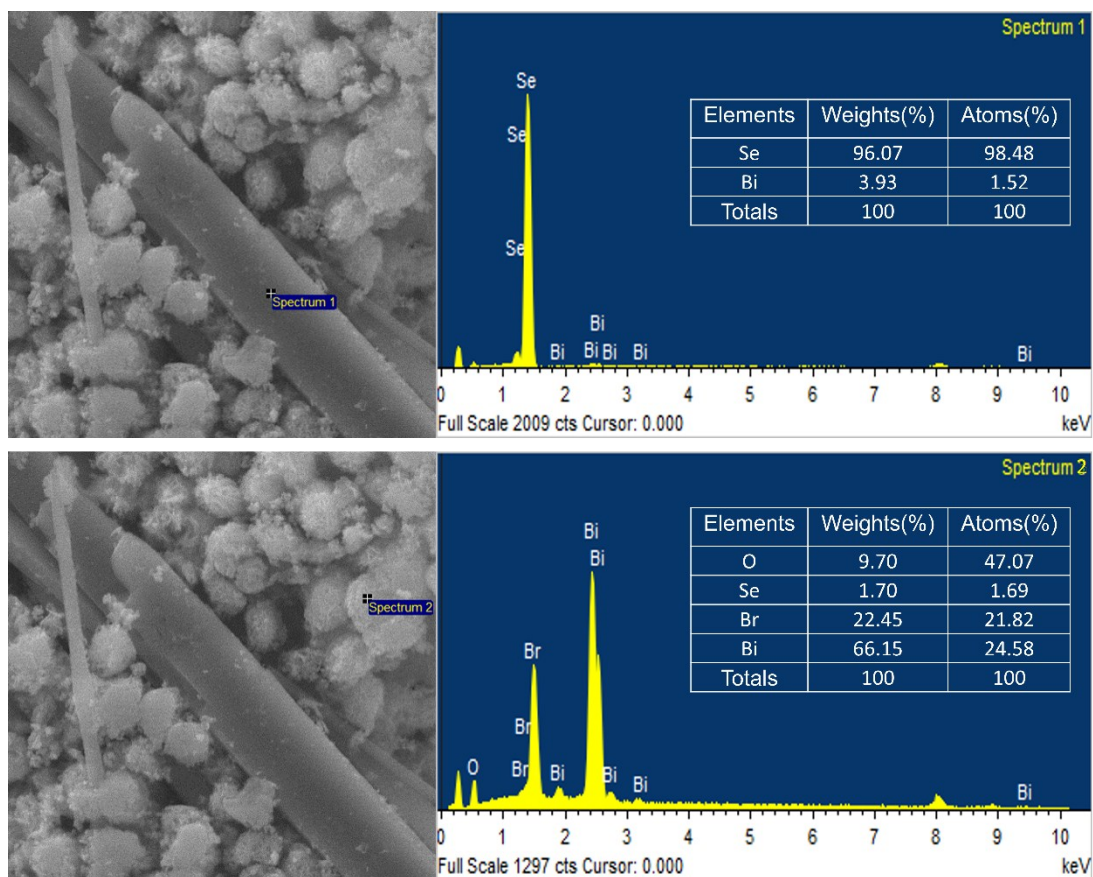

Figure.S3 SEM and EDS spectra of the products obtained at 0.5 h

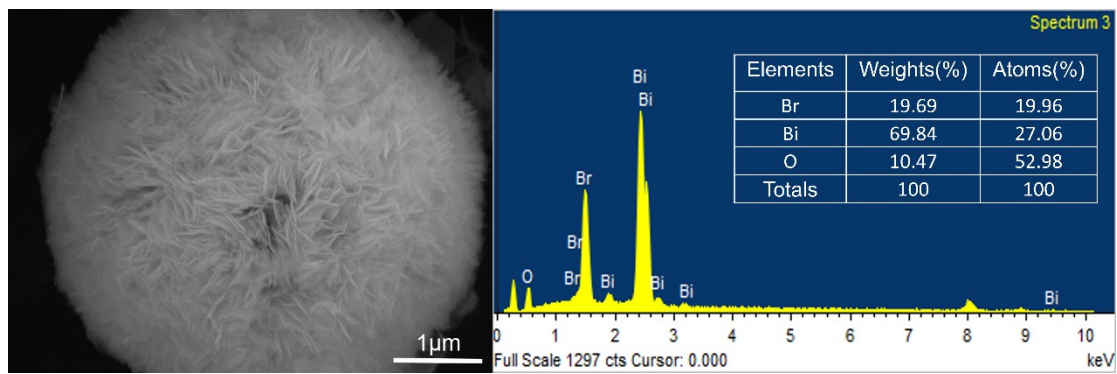

Figure.S4 SEM and EDS of BiOBr

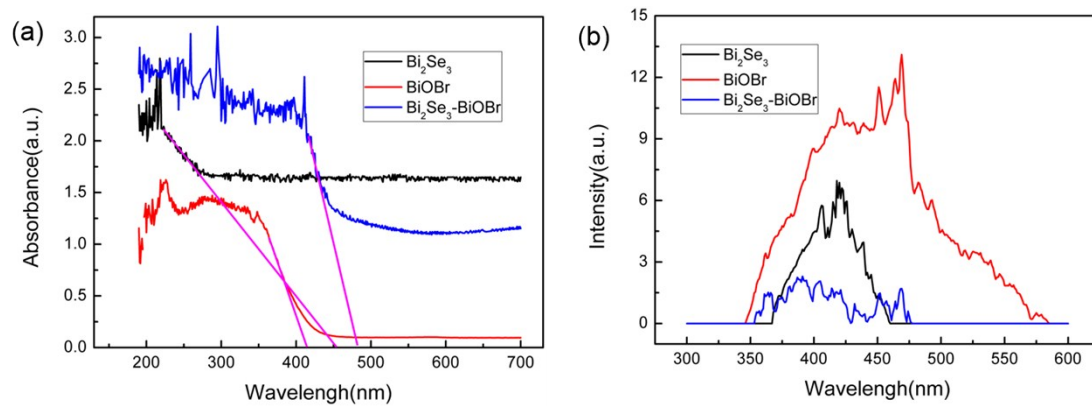

Figure.S5 (a) UV-vis DRS spectra of three samples; (b) PL spectra of three samples with an excitation wavelength of 325 nm.
